# Supplementary material for: Association of metabolic syndrome traits with urinary biomarkers in Japanese adults
Source: PubMed Central journal article supplement (PMC8760661; doi:10.1186/s13098-021-00779-5), 2022-01-15
Supplement: 13098_2021_779_MOESM1_ESM.pdf [file 13098_2021_779_MOESM1_ESM.pdf]

## **Additional file 1**

### **Association of metabolic syndrome traits with urinary biomarkers in Japanese adults**

**Table S1.** Linear regression analysis between abdominal visceral fat area and urinary biomarkers

**Table S2.** Logistic regression analysis between urinary biomarkers and abdominal visceral obesity

**Table S1.** Linear regression analysis between abdominal visceral fat area and urinary biomarkers

|                           | $\beta$ (95%CI)        | <i>P</i> -value |
|---------------------------|------------------------|-----------------|
| Albumin                   | 0.003 (0.0003, 0.006)  | 0.034           |
| A-megalin                 | 0.002 (0.0007, 0.004)  | 0.004           |
| C-megalin                 | 0.004 (-0.001, 0.009)  | 0.166           |
| Podocalyxin               | -0.001 (-0.004, 0.001) | 0.268           |
| $\alpha_1$ -microglobulin | 0.004 (0.001, 0.006)   | 0.003           |
| $\beta_2$ -microglobulin  | -0.002 (-0.005, 0.002) | 0.344           |
| NAG                       | 0.002 (0.0002, 0.004)  | 0.027           |

Abbreviation: NAG, *N*-acetyl- $\beta$ -D-glucosaminidase.

Linear regression analysis was performed with each natural log-transformed urinary biomarker as a dependent variable.

**Table S2.** Logistic regression analysis between urinary biomarkers and abdominal visceral obesity

|                           | Crude                  |                     | Demographic-adjusted   |                     | Multivariable-adjusted |                     |
|---------------------------|------------------------|---------------------|------------------------|---------------------|------------------------|---------------------|
|                           | Odds ratio<br>(95% CI) | <i>P</i> -<br>value | Odds ratio<br>(95% CI) | <i>P</i> -<br>value | Odds ratio<br>(95% CI) | <i>P</i> -<br>value |
| Albumin                   | 1.34<br>(0.99, 1.81)   | 0.061               | 1.59<br>(1.16, 2.19)   | 0.004               | 1.46<br>(1.04, 2.06)   | 0.030               |
| A-megalin                 | 1.74<br>(1.26, 2.40)   | <0.001              | 1.91<br>(1.34, 2.73)   | <0.001              | 1.82<br>(1.26, 2.64)   | 0.002               |
| C-megalin                 | 1.25<br>(0.93, 1.67)   | 0.140               | 1.19<br>(0.87, 1.63)   | 0.269               |                        |                     |
| Podocalyxin               | 0.86<br>(0.65, 1.15)   | 0.313               | 0.89<br>(0.65, 1.20)   | 0.443               |                        |                     |
| $\alpha_1$ -microglobulin | 1.29<br>(0.96, 1.74)   | 0.093               | 1.25<br>(0.89, 1.74)   | 0.197               |                        |                     |
| $\beta_2$ -microglobulin  | 0.90<br>(0.67, 1.21)   | 0.492               | 1.04<br>(0.76, 1.43)   | 0.796               |                        |                     |
| NAG                       | 1.40<br>(1.03, 1.90)   | 0.032               | 1.56<br>(1.10, 2.22)   | 0.014               | 1.20<br>(0.81, 1.77)   | 0.361               |

Abbreviation: NAG, *N*-acetyl- $\beta$ -D-glucosaminidase.

Each urinary biomarker is treated as a quartile. Abdominal visceral obesity is defined as having  $\geq 100$  cm<sup>2</sup> abdominal visceral fat area. The demographic-adjusted model includes age (continuous) and male sex. The multivariable-adjusted model includes age (continuous), male sex, and eGFR (continuous).
